# Supplementary material for: The Association of Ascorbic Acid, Deferoxamine and N-Acetylcysteine Improves Cardiac Fibroblast Viability and Cellular Function Associated with Tissue Repair Damaged by Simulated Ischemia/Reperfusion
Source: Antioxidants (Basel). 2019 Dec 3;8(12):614. doi: 10.3390/antiox8120614 (PMC6943610; doi:10.3390/antiox8120614)
Supplement: Supplementary file 1 [file antioxidants-08-00614-s001.pdf]

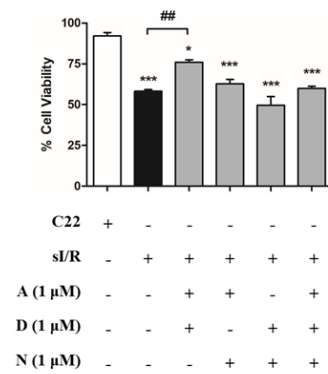

**Figure S1.** Effects of associations between ascorbic acid, deferoxamine, and N-acetylcysteine, at 1  $\mu$ M each, on viability of cardiac fibroblasts exposed to simulated ischemia/reperfusion. Cardiac fibroblasts were exposed to 6 h simulated ischemia followed by 16 h simulated reperfusion (sI/R). Associations between ascorbic acid (A), deferoxamine (D), and N-acetylcysteine (N), using 1  $\mu$ M of each antioxidant, were added at the beginning of simulated reperfusion. Cell viability was quantified as a percentage (%) of number of cells after 6 h normoxia (100%) by cell count after trypan blue staining ( $n = 3$ ). The results are expressed as mean  $\pm$  S.E.M. \*\*\*  $p < 0.001$ , \*  $p < 0.05$  vs. C22 (control cells after 22 h normoxia); ##  $p < 0.01$  vs. sI/R.

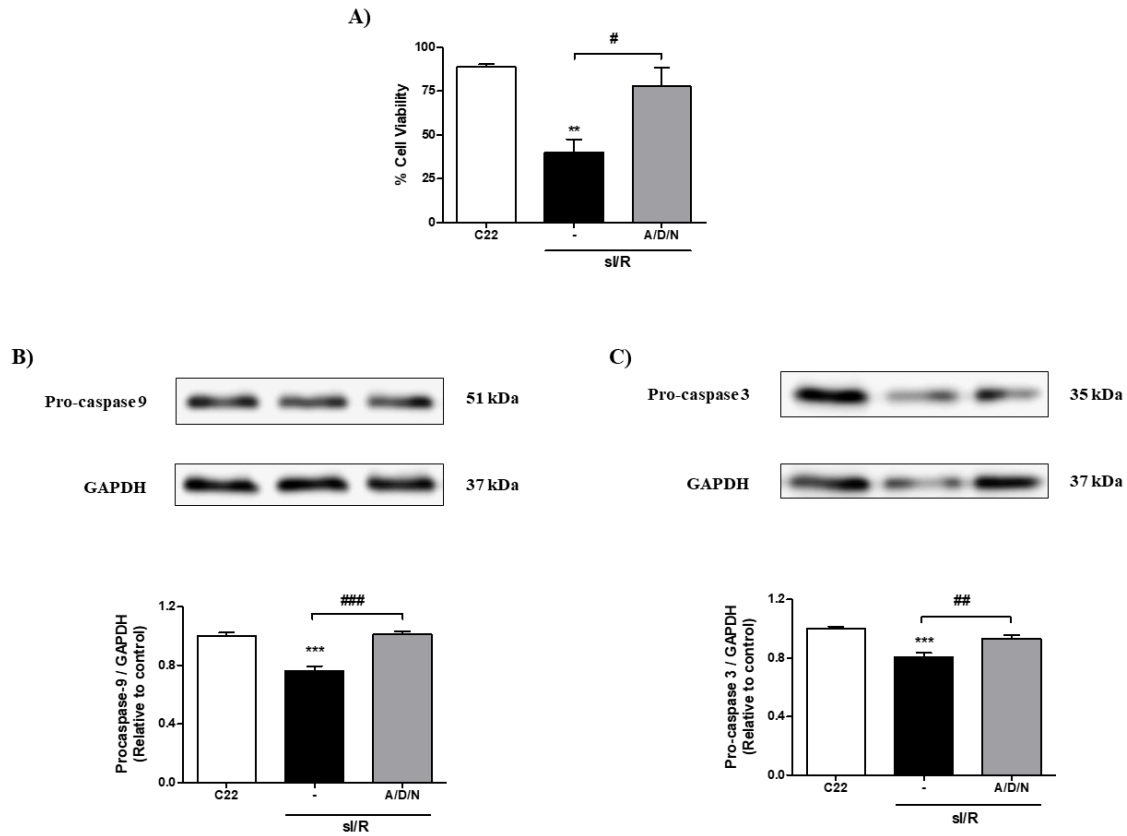

**Figure S2.** Effects of associations between ascorbic acid, deferoxamine, and N-acetylcysteine, at 10  $\mu$ M each, on viability and protein levels of pro-caspases 9 and 3 of cardiomyocytes exposed to simulated ischemia/reperfusion. Cardiomyocytes were exposed to 6 h simulated ischemia followed by 16 h simulated reperfusion (sI/R). Associations between ascorbic acid (A), deferoxamine (D), and N-acetylcysteine (N), using 10  $\mu$ M of each antioxidant, were added at the beginning of simulated reperfusion. **(A)** Cell viability was quantified as a percentage (%) of number of cells after 6 h normoxia (100%) by cell count after trypan blue staining ( $n = 3$ ). **(B)** and **(C)** show representative Western blots (upper panel) and densitometric analysis (lower panel) of pro-caspase 9 ( $n = 4$ ) and pro-caspase-3 ( $n = 4$ ), respectively. GAPDH was used as loading control. The results are expressed as mean  $\pm$  S.E.M. \*\*\*  $p < 0.001$ , \*\*  $p < 0.01$  vs. C22 (Control cells after 22 h normoxia); ###  $p < 0.001$ , ##  $p < 0.01$ , #  $p < 0.05$  vs. sI/R.
